# Supplementary material for: Impact of Selective Evidence Presentation on Judgments of Health Inequality Trends: An Experimental Study
Source: PubMed Central journal article supplement (PMC3656043; doi:10.1371/journal.pone.0063362), 2013-05-16
Supplement: pone.0063362.s004.pdf [file pone.0063362.s004.pdf]

Table S1: Scenarios depicting inconsistent and consistent changes in absolute and relative mortality inequalities after a hypothetical intervention.

| Scenario and magnitude of inequality change                                      | Mortality Before Intervention |       | Mortality After Intervention |       | Inequality Before Intervention |            | Inequality After Intervention |            |
|----------------------------------------------------------------------------------|-------------------------------|-------|------------------------------|-------|--------------------------------|------------|-------------------------------|------------|
|                                                                                  | Pop A                         | Pop B | Pop A                        | Pop B | Risk Diff.                     | Risk Ratio | Risk Diff.                    | Risk Ratio |
| Inconsistent: Decreasing absolute inequalities, increasing relative inequalities |                               |       |                              |       |                                |            |                               |            |
| a) smaller change                                                                | 1000                          | 500   | 200                          | 95    | 500                            | 2.00       | 105                           | 2.11       |
| b) larger change                                                                 | 1000                          | 500   | 500                          | 100   | 500                            | 2.00       | 400                           | 5.00       |
| Inconsistent: Constant absolute inequalities, increasing relative inequalities   |                               |       |                              |       |                                |            |                               |            |
| a) smaller change                                                                | 1000                          | 500   | 900                          | 400   | 500                            | 2.00       | 500                           | 2.25       |
| b) larger change                                                                 | 1000                          | 500   | 600                          | 100   | 500                            | 2.00       | 500                           | 6.00       |
| Inconsistent: Decreasing absolute inequalities, constant relative inequalities   |                               |       |                              |       |                                |            |                               |            |
| a) smaller change                                                                | 1000                          | 500   | 800                          | 400   | 500                            | 2.00       | 400                           | 2.00       |
| b) larger change                                                                 | 1000                          | 400   | 200                          | 80    | 600                            | 2.50       | 120                           | 2.50       |
| Consistent: Decreasing absolute inequalities, decreasing relative inequalities   |                               |       |                              |       |                                |            |                               |            |
| a) smaller change                                                                | 1000                          | 200   | 500                          | 190   | 800                            | 5.00       | 310                           | 2.63       |
| b) larger change                                                                 | 600                           | 300   | 500                          | 275   | 300                            | 2.00       | 225                           | 1.82       |
| Consistent: Increasing absolute inequalities, increasing relative inequalities   |                               |       |                              |       |                                |            |                               |            |
| a) smaller change                                                                | 1000                          | 800   | 800                          | 100   | 200                            | 1.25       | 700                           | 8.00       |
| b) larger change                                                                 | 1000                          | 500   | 900                          | 300   | 500                            | 2.00       | 600                           | 3.00       |
