# Supplementary material for: Impact of Selective Evidence Presentation on Judgments of Health Inequality Trends: An Experimental Study
Source: PubMed Central journal article supplement (PMC3656043; doi:10.1371/journal.pone.0063362), 2013-05-16
Supplement: pone.0063362.s005.pdf [file pone.0063362.s005.pdf]

Table S2. Logistic regression estimates for judgment of whether inequality increased or decreased.

| Variable                | Estimate  | Inconsistent Scenarios                |                                      |                                      | Consistent Scenarios                  |                                       |
|-------------------------|-----------|---------------------------------------|--------------------------------------|--------------------------------------|---------------------------------------|---------------------------------------|
|                         |           | Difference decreases, ratio increases | Difference constant, ratio increases | Difference decreases, ratio constant | Difference decreases, ratio decreases | Difference increases, ratio increases |
| Post vs. Pre            | $\beta^*$ | -0.373                                | 0.000                                | -0.429                               | 1.587                                 | 0.315                                 |
|                         | 95% CI    | (-1.02,0.27)                          | (-0.70,0.70)                         | (-1.09,0.24)                         | (0.28,2.90)                           | (-1.34,1.97)                          |
| Ratio vs. Difference    | $\beta$   | 0.114                                 | -0.231                               | -0.000                               | 0.830                                 | -0.000                                |
|                         | 95% CI    | (-0.43,0.66)                          | (-1.52,1.05)                         | (-0.57,0.57)                         | (-0.42,2.08)                          | (-1.78,1.78)                          |
| Post X Ratio            | $\beta$   | 1.865                                 | 1.484                                | 2.281                                | -0.830                                | 0.000                                 |
|                         | 95% CI    | (0.96,2.77)                           | (0.32,2.65)                          | (1.21,3.35)                          | (-2.61,0.95)                          | (-2.14,2.14)                          |
| Large vs. small change† | $\beta$   | 0.538                                 | 0.451                                | -0.000                               | 0.909                                 | -0.000                                |
|                         | 95% CI    | (0.03,1.04)                           | (0.16,0.74)                          | (-0.47,0.47)                         | (-0.28,2.10)                          | (-0.88,0.88)                          |
| Constant                | $\beta$   | -1.012                                | -0.852                               | -0.302                               | 0.993                                 | 2.197                                 |
|                         | 95% CI    | (-1.72,-0.30)                         | (-1.73,0.02)                         | (-0.95,0.35)                         | (0.11,1.88)                           | (1.27,3.12)                           |
| <i>Observations</i>     |           | 160                                   | 160                                  | 160                                  | 160                                   | 160                                   |

\*Log odds of agreement with ratio measure of inequality. CI, confidence interval (clustered by subject).

† p-values for treatment heterogeneity by Large vs. small change (i.e., Post X Ratio X Large) were 0.236, 0.152, 0.400, 0.573, and 0.471 across the 5 scenarios.
