# Supplementary material for: Impact of Selective Evidence Presentation on Judgments of Health Inequality Trends: An Experimental Study
Source: PubMed Central journal article supplement (PMC3656043; doi:10.1371/journal.pone.0063362), 2013-05-16
Supplement: pone.0063362.s006.pdf [file pone.0063362.s006.pdf]

Table S3. Linear regression estimates for respondent's judgment of program success.

| Variable                | Estimate  | Inconsistent Scenarios                |                                      |                                      | Consistent Scenarios                  |                                       |
|-------------------------|-----------|---------------------------------------|--------------------------------------|--------------------------------------|---------------------------------------|---------------------------------------|
|                         |           | Difference decreases, ratio increases | Difference constant, ratio increases | Difference decreases, ratio constant | Difference decreases, ratio decreases | Difference increases, ratio increases |
| Post vs. Pre            | $\beta^*$ | -0.125                                | -0.275                               | 0.200                                | 0.075                                 | 0.100                                 |
|                         | 95% CI    | (-0.81,0.56)                          | (-0.63,0.08)                         | (-0.27,0.67)                         | (-0.30,0.45)                          | (-0.58,0.78)                          |
| Ratio vs. Difference    | $\beta$   | -0.650                                | -0.475                               | 0.175                                | 0.150                                 | -0.225                                |
|                         | 95% CI    | (-1.07,-0.23)                         | (-1.13,0.18)                         | (-0.50,0.85)                         | (-0.36,0.66)                          | (-0.94,0.49)                          |
| Post X Ratio            | $\beta$   | -0.875                                | 0.175                                | -1.525                               | 0.275                                 | -0.075                                |
|                         | 95% CI    | (-1.72,-0.03)                         | (-0.37,0.72)                         | (-2.39,-0.66)                        | (-0.27,0.82)                          | (-0.96,0.81)                          |
| Large vs. small change† | $\beta$   | -1.512                                | 0.087                                | 0.763                                | 1.512                                 | -0.113                                |
|                         | 95% CI    | (-2.03,-1.00)                         | (-0.25,0.43)                         | (0.18,1.34)                          | (1.14,1.88)                           | (-0.56,0.34)                          |
| Constant                | $\beta$   | 5.106                                 | 2.206                                | 3.469                                | 3.969                                 | 1.906                                 |
|                         | 95% CI    | (4.35,5.86)                           | (1.66,2.75)                          | (2.93,4.01)                          | (3.47,4.47)                           | (1.41,2.40)                           |
| <i>Observations</i>     |           | 160                                   | 160                                  | 160                                  | 160                                   | 160                                   |

\*Effect on subject's assessment of whether the hypothetical intervention was successful (1=not at all ... 7=very successful). CI, confidence interval (clustered by subject). † p-values for treatment heterogeneity by Large vs. small change (i.e., Post X Ratio X Large) were 0.195, 0.768, 0.427, 0.373, and 0.379 across the 5 scenarios.
