# Supplementary material for: Impact of Selective Evidence Presentation on Judgments of Health Inequality Trends: An Experimental Study
Source: PubMed Central journal article supplement (PMC3656043; doi:10.1371/journal.pone.0063362), 2013-05-16
Supplement: pone.0063362.s007.pdf [file pone.0063362.s007.pdf]

Table S4. Regression estimates for amount of money respondent was willing to give to support continuation of the hypothetical program.

|                        |                     | Inconsistent Scenarios                      |                                               |                                            | Consistent Scenarios                           |                                                |
|------------------------|---------------------|---------------------------------------------|-----------------------------------------------|--------------------------------------------|------------------------------------------------|------------------------------------------------|
|                        |                     | Difference<br>decreases,<br>ratio increases | Difference<br>constant,<br>ratio<br>increases | Difference<br>decreases,<br>ratio constant | Difference<br>decreases,<br>ratio<br>decreases | Difference<br>increases,<br>ratio<br>increases |
| Post vs. Pre           | $\beta^*$<br>95% CI | 3.45<br>(-10.21,17.11)                      | -4.70<br>(-9.43,0.03)                         | -4.65<br>(-11.73,2.43)                     | -0.73<br>(-6.20,4.75)                          | -9.05<br>(-14.95,-3.15)                        |
| Ratio vs. Difference   | $\beta^*$<br>95% CI | -12.60<br>(-33.00,7.80)                     | 2.60<br>(-8.71,13.91)                         | 1.92<br>(-7.15,11.00)                      | 7.92<br>(-1.22,17.07)                          | -3.05<br>(-14.38,8.28)                         |
| Post X Ratio           | $\beta^*$<br>95% CI | -15.30<br>(-32.48,1.88)                     | -5.67<br>(-12.63,1.28)                        | -10.38<br>(-22.05,1.30)                    | -0.63<br>(-8.94,7.69)                          | 3.63<br>(-4.12,11.37)                          |
| Large vs. small change | $\beta^*$<br>95% CI | -28.00<br>(-47.56,-8.44)                    | 16.59<br>(9.50,23.68)                         | 26.16<br>(18.51,33.82)                     | 26.49<br>(19.67,33.30)                         | 12.14<br>(5.01,19.27)                          |
| Post X Large           | $\beta^*$<br>95% CI | -15.75<br>(-34.40,2.90)                     |                                               |                                            |                                                |                                                |
| Ratio X Large          | $\beta^*$<br>95% CI | 16.55<br>(-20.61,53.71)                     |                                               |                                            |                                                |                                                |
| Post X Ratio X Large†  | $\beta^*$<br>95% CI | 24.90<br>(0.02,49.78)                       |                                               |                                            |                                                |                                                |
| Constant               | $\beta^*$<br>95% CI | 65.75<br>(51.97,79.53)                      | 13.86<br>(6.29,21.42)                         | 29.67<br>(21.50,37.84)                     | 17.86<br>(9.35,26.36)                          | 17.43<br>(9.05,25.81)                          |
| <i>Observations</i>    |                     | 160                                         | 160                                           | 160                                        | 160                                            | 160                                            |

\*Effect on amount of subject's money to be donated to support program continuation (Minimum=\$0, Maximum=\$100). CI, confidence interval (clustered by subject). † p-values for treatment heterogeneity by Large vs. small change (i.e., Post X Ratio X Large) were 0.050, 0.290, 0.052, 0.959, and 0.778 across the 5 scenarios.
