# Supplementary material for: Impact of Selective Evidence Presentation on Judgments of Health Inequality Trends: An Experimental Study
Source: PubMed Central journal article supplement (PMC3656043; doi:10.1371/journal.pone.0063362), 2013-05-16
Supplement: pone.0063362.s008.pdf [file pone.0063362.s008.pdf]

Table S5. Regression estimates for respondent's assessment of whether the hypothetical program should continue.

|                        |                     | Inconsistent Scenarios                |                                      |                                      | Consistent Scenarios                  |                                       |
|------------------------|---------------------|---------------------------------------|--------------------------------------|--------------------------------------|---------------------------------------|---------------------------------------|
|                        |                     | Difference decreases, ratio increases | Difference constant, ratio increases | Difference decreases, ratio constant | Difference decreases, ratio decreases | Difference increases, ratio increases |
| Post vs. Pre           | $\beta^*$<br>95% CI | -0.03<br>(-0.66,0.61)                 | -0.20<br>(-0.66,0.26)                | -0.55<br>(-1.30,0.20)                | 0.13<br>(-0.22,0.47)                  | -0.43<br>(-0.87,0.02)                 |
| Ratio vs. Difference   | $\beta^*$<br>95% CI | 0.07<br>(-0.34,0.49)                  | -0.00<br>(-0.93,0.93)                | -1.05<br>(-2.02,-0.08)               | 0.15<br>(-0.36,0.66)                  | 0.37<br>(-0.57,1.32)                  |
| Post X Ratio           | $\beta^*$<br>95% CI | -0.57<br>(-1.35,0.20)                 | -0.83<br>(-1.48,-0.17)               | 0.65<br>(-0.44,1.74)                 | -0.00<br>(-0.52,0.52)                 | 0.18<br>(-0.42,0.77)                  |
| Large vs. small change | $\beta^*$<br>95% CI | -1.31<br>(-1.72,-0.90)                | 1.29<br>(0.84,1.73)                  | 0.95<br>(-0.00,1.90)                 | 1.58<br>(1.18,1.97)                   | 0.84<br>(0.32,1.36)                   |
| Post X Large           | $\beta^*$<br>95% CI |                                       |                                      | 0.40<br>(-0.58,1.38)                 |                                       |                                       |
| Ratio X Large          | $\beta^*$<br>95% CI |                                       |                                      | 1.00<br>(-0.42,2.42)                 |                                       |                                       |
| Post X Ratio X Large†  | $\beta^*$<br>95% CI |                                       |                                      | -1.80<br>(-3.34,-0.26)               |                                       |                                       |
| Constant               | $\beta^*$<br>95% CI | 6.01<br>(5.47,6.55)                   | 3.21<br>(2.50,3.91)                  | 5.00<br>(4.34,5.66)                  | 3.99<br>(3.53,4.45)                   | 2.88<br>(2.25,3.51)                   |
| <i>Observations</i>    |                     | 160                                   | 160                                  | 160                                  | 160                                   | 160                                   |

\*Effect on subject's assessment of whether the program should continue (1=definitely not ... 7=very definitely should continue). CI, confidence interval (clustered by subject). † p-values for treatment heterogeneity by Large vs. small change (i.e., Post X Ratio X Large) were 0.369, 0.471, 0.024, 0.449, and 0.915 across the 5 scenarios.
